# Supplementary material for: Genomic Analysis of Uterine Lavage Fluid Detects Early Endometrial Cancers and Reveals a Prevalent Landscape of Driver Mutations in Women without Histopathologic Evidence of Cancer: A Prospective Cross-Sectional Study
Source: PLoS Med. 2016 Dec 27;13(12):e1002206. doi: 10.1371/journal.pmed.1002206 (PMC5189938; doi:10.1371/journal.pmed.1002206)
Supplement: S1 Table — (XLSX) [file pmed.1002206.s013.xlsx]

## Sheet: Sheet1
Gene Name	Chromosome	Target Start	Target End
ARID1A	1	27099942	27100026
ARID1A	1	27100143	27100223
ARID1A	1	27101002	27101077
ARID1A	1	27105474	27105634
ARID1A	1	27106282	27106376
CTNNB1	3	41266037	41266140
PIK3CA	3	178916806	178916963
PIK3CA	3	178921462	178921563
PIK3CA	3	178927399	178927471
PIK3CA	3	178927918	178928005
PIK3CA	3	178928070	178928161
PIK3CA	3	178936022	178936108
PIK3CA	3	178938806	178938876
PIK3CA	3	178947811	178947887
PIK3CA	3	178952000	178952107
PIK3CA	3	178952142	178952242
FBXW7	4	153245377	153245470
FBXW7	4	153247269	153247374
FBXW7	4	153249374	153249478
FBXW7	4	153250842	153250918
FBXW7	4	153258967	153259122
PIK3R1	5	67589479	67589700
PIK3R1	5	67590278	67590559
PIK3R1	5	67590894	67591184
APC	5	112173873	112173970
APC	5	112174572	112174677
APC	5	112175155	112175261
APC	5	112175322	112175432
APC	5	112175569	112175711
APC	5	112175745	112175839
APC	5	112175897	112175972
APC	5	112175977	112176076
PTEN	10	89624189	89624314
PTEN	10	89653781	89653869
PTEN	10	89685244	89685334
PTEN	10	89690763	89690848
PTEN	10	89692769	89693008
PTEN	10	89711855	89712023
PTEN	10	89717590	89717776
PTEN	10	89720569	89720700
PTEN	10	89720774	89720879
PTEN	10	89725040	89725142
FGFR2	10	123257972	123258060
FGFR2	10	123274765	123274846
FGFR2	10	123279481	123279564
FGFR2	10	123279603	123279687
ATM	11	108117763	108117853
ATM	11	108119807	108119896
ATM	11	108123504	108123573
ATM	11	108137953	108138045
ATM	11	108155081	108155177
ATM	11	108170464	108170629
ATM	11	108172341	108172442
ATM	11	108173631	108173795
ATM	11	108180901	108180969
ATM	11	108200906	108200990
ATM	11	108204632	108204693
ATM	11	108205711	108205821
ATM	11	108206518	108206620
ATM	11	108218039	108218142
ATM	11	108225543	108225635
ATM	11	108236038	108236231
KRAS	12	25378557	25378661
KRAS	12	25380262	25380360
KRAS	12	25398215	25398311
RB1	13	48919221	48919299
RB1	13	48923122	48923213
RB1	13	48936958	48937013
RB1	13	48941591	48941676
RB1	13	48942648	48942722
RB1	13	48953700	48953767
RB1	13	48955482	48955568
RB1	13	49027102	49027182
RB1	13	49033826	49033935
RB1	13	49037825	49037928
RB1	13	49039146	49039246
RB1	13	49039364	49039419
TP53	17	7572917	7573014
TP53	17	7573891	7574042
TP53	17	7576482	7576693
TP53	17	7576814	7576962
TP53	17	7577009	7577188
TP53	17	7577451	7577627
TP53	17	7578143	7578556
TP53	17	7579287	7579596
TP53	17	7579699	7579768
TP53	17	7579831	7579930
