# Supplementary material for: Genomic Analysis of Uterine Lavage Fluid Detects Early Endometrial Cancers and Reveals a Prevalent Landscape of Driver Mutations in Women without Histopathologic Evidence of Cancer: A Prospective Cross-Sectional Study
Source: PLoS Med. 2016 Dec 27;13(12):e1002206. doi: 10.1371/journal.pmed.1002206 (PMC5189938; doi:10.1371/journal.pmed.1002206)
Supplement: S6 Table — "^," patients with cancer as diagnosed by histopathology. "-," did not pass QC metrics. "NT," not tested. (XLSX) [file pmed.1002206.s018.xlsx]

## Sheet: Sheet1
						Cell pellet DNA				cfDNA
Patient	Gene	Chromosomal Position	Ref / Alt allele	Mutation	Mutation Class	Allele Count	Coverage	NGS AF	ddPCR or Sanger seq AF	Allele Count	Coverage	NGS AF	ddPCR or Sanger seq AF
PT380	PIK3CA	3:178952085	A/G	H1047R	Driver	52	3940	0.013	0.01	0	0	0	0.003
PT380	KRAS	12:25398284	C/A	G12C	Driver	62	4281	0.015	0.016	0	0	0	0.007
PT381	KRAS	12:25398284	C/T	G12S	Driver	135	5603	0.024	0.01	-	-	-	-
PT394	PIK3CA	3:178952085	A/G	H1047R	Driver	88	4303	0.021	0.011	0	0	0	0.001
PT395	FGFR2	10:123279677	G/C	p.S252W	Driver	220	3801	0.058	0.062	106	4563	0.023	0.032
PT395	PTEN	10:89692904	C/G	R130G	Driver	118	4982	0.024	0.014	71	5426	0.013	0.008
PT395	KRAS	12:25398284	C/T	G12S	Driver	0	0	0	0.008	53	4740	0.011	0.004
PT395	KRAS	12:25398284	C/A	G12C	Driver	0	0	0	0	298	4740	0.063	0.033
PT398^	CTNNB1	3:41266137	C/T	S45F	Potential driver	390	3114	0.125	0.1	141	3036	0.046	0.055
PT398^	PTEN	10:89692848	G/A	W111*	Driver	446	7888	0.057	0.1	919	6383	0.144	0.1
PT398^	PTEN	10:89692911	G/A	G132D	Driver	2396	7944	0.302	0.4	1973	6265	0.315	0.4
PT399	FBXW7	4:153247289	G/A	R505C	Driver	467	9355	0.05	0.047	0	0	0	NT
PT399	FGFR2	10:123279677	G/C	p.S252W	Driver	355	6980	0.051	0.05	0	0	0	NT
PT399	PTEN	10:89692904	C/G	p.R130G	Driver	107	8302	0.013	0.013	0	0	0	NT
PT402	PIK3CA	3:178936092	A/C	E545A	Driver	0	0	0	NT	80	6581	0.012	0.002
PT404	PIK3CA	3:178916876	G/A	R88Q	Driver	738	11813	0.063	0.084	764	15754	0.049	0.045
PT402	PTEN	10:89692899	A/C	p.K128Q	Driver	104	4224	0.025	0.002	0	0	0	NT
PT404	KRAS	12:25398284	C/A	G12C	Driver	466	6732	0.069	0.047	199	7801	0.026	0.016
PT406	PIK3CA	3:178916890	C/T	p.R93W	Driver	1074	13081	0.082	0.079	568	15553	0.037	0.025
PT407	PIK3CA	3:178916890	C/T	p.R93W	Driver	317	11928	0.027	0.024	0	0	0	NT
PT409	FGFR2	10:123279677	G/C	p.S252W	Driver	113	4956	0.023	0.023	-	-	-	-
PT422	PIK3CA	3:178936082	G/A	p.E542K	Driver	-	-	-	-	208	9427	0.022	0.011
PT423	KRAS	12:25398284	C/A	G12C	Driver	189	6276	0.03	0.012	-	-	-	-
PT434	KRAS	12:25398284	C/T	G12S	Driver	123	6398	0.019	0.011	409	8854	0.046	0.028
PT434	PIK3CA	3:178936082	G/A	p.E542K	Driver	337	7312	0.046	0.014	294	11027	0.027	0.014
PT442	CTNNB1	3:41266098	A/C	D32A	Potential driver	0	0	0	0.011	265	3250	0.081	0.072
PT442	CTNNB1	3:41266113	C/T	S37F	Driver	261	3955	0.066	0.063	225	3250	0.069	0.072
PT451^	FGFR2	10:123279677	G/C	p.S252W	Driver	12	1071	0.011	0.023	60	3576	0.017	0.017
PT456	PIK3CA	3:178952085	A/G	H1047R	Driver	156	7065	0.022	0.012	-	-	-	-
PT459	PTEN	10:89692904	C/G	R130G	Driver	112	7166	0.016	0.013	0	0	0	NT
PT459	KRAS	12:25398284	C/T	p.G12S	Driver	1327	6351	0.209	0.2	345	8901	0.039	0.025
PT464	ARID1A	1:27105553	C/T	p.R1722*	Driver	106	10599	0.01	0.006	0	0	0	NT
PT465	KRAS	12:25398284	C/A	G12C	Driver	169	7549	0.022	0.016	217	10427	0.021	0.009
PT465	KRAS	12:25398284	C/T	G12S	Driver	0	0	0	NT	193	10427	0.019	0.029
PT468^	ARID1A	1:27105553	C/T	p.R1722*	Driver	1547	7845	0.197	0.2	1549	8609	0.18	0.2
PT468^	PIK3CA	3:178916854	G/A	p.E81K	Driver	336	5902	0.057	NT	1038	5489	0.189	0.15
PT468^	PTEN	10:89653800	T/G	I33S	Potential driver	2620	11506	0.228	0.1	3714	12837	0.289	0.1
PT468^	PTEN	10:89692905	G/A	R130Q	Driver	1565	7163	0.219	0.2	2474	6372	0.388	0.5
PT468^	RB1	13:48941662	T/G	I324M	Passenger	2352	12381	0.19	0.3	1982	10989	0.18	0.1
PT471	KRAS	12:25398284	C/A	G12C	Driver	0	0	0	NT	116	10929	0.011	0.004
PT473	PIK3CA	3:178952085	A/G	H1047R	Driver	182	6418	0.028	0.016	0	0	0	0.001
PT475	KRAS	12:25398284	C/T	G12S	Driver	90	6415	0.014	0.007	0	0	0	0.001
PT475	KRAS	12:25398284	C/A	G12C	Driver	84	6415	0.013	0.004	0	0	0	0.001
PT476	PIK3CA	3:178936082	G/A	p.E542K	Driver	168	8387	0.02	0.009	0	0	0	NT
PT476	PIK3CA	3:178952085	A/G	H1047R	Driver	282	4969	0.057	0.053	383	8969	0.043	0.044
PT476	PTEN	10:89690808	CTGAA/C	H74fs	Driver	148	14048	0.011	0.006	203	18833	0.011	NT
PT485	PIK3CA	3:178952085	A/G	H1047R	Driver	129	4291	0.03	0.022	0	0	0.011	0.011
PT485	KRAS	12:25398284	C/T	G12S	Driver	92	8419	0.011	0.005	0	0	0	0.005
PT488^	TP53	17:7578403	C/A	C176F	Potential driver	1214	13549	0.09	NT	2210	14322	0.154	0.3
PT488^	TP53	17:7578435	CT/C	Q165fs	Driver	635	9677	0.066	0.1	4072	10677	0.381	0.3
PT490	KRAS	12:25398284	C/T	G12S	Driver	94	7397	0.013	0.008	0	0	0	0.001
PT497	PIK3CA	3:178952085	A/G	H1047R	Driver	79	3914	0.02	0.019	0	0	0.004	0.004
PT500	KRAS	12:25398284	C/T	G12S	Driver	111	8151	0.014	0.005	-	-	-	-
PT508	PIK3CA	3:178952085	A/G	H1047R	Driver	159	12396	0.013	0.007	0	0	0	0
PT520	KRAS	12:25398284	C/T	G12S	Driver	378	13174	0.029	0.024	442	15055	0.029	0.021
"^", Patients with cancer as diagnosed by histopathology
"-", Did not pass QC metrics
"NT", not tested
